# Supplementary material for: The genome of pest Rhynchophorus ferrugineus reveals gene families important at the plant-beetle interface
Source: PubMed Central journal article supplement (PMC7314810; doi:10.1038/s42003-020-1060-8), 2020-06-24
Supplement: 42003_2020_1060_MOESM20_ESM.pdf [file 42003_2020_1060_MOESM20_ESM.pdf]

## Supplementary data file legend

**Supplementary data file 1** Diversity estimate  $\pi$  ( $\pi$ ) for red palm weevil (*R. ferrugineus*) using Angsd (<http://www.popgen.dk/angsd/index.php/ANGSD>)

**Supplementary data file 2** Transposable elements identification among the five species of insects in the study using Repeatmasker software (<http://www.repeatmasker.org>)

**Supplementary data file 3** Summary of the mitochondrial genes of the red palm weevil (*R. ferrugineus*).

**Supplementary data file 4** Annotation of red palm weevil proteins (*R. ferrugineus*) using NCBI non-redundant database (nr).

**Supplementary data file 5** Annotation of red palm weevil proteins (*R. ferrugineus*) using GO ontology terms.

**Supplementary data file 6** Annotation of red palm weevil proteins (*R. ferrugineus*) using InterProScan database.

**Supplementary data file 7** PFAM protein domain annotation of red palm weevil (*R. ferrugineus*) from InterProScan.

**Supplementary data file 8** KEGG pathway annotation of red palm weevil (*R. ferrugineus*)

**Supplementary data file 9** Enrichment results of red palm weevil proteins (*R. ferrugineus*) using 'Molecular Function from Gene Ontology (GO)', created by dcGO Enrichment.

**Supplementary data file 10** Comparative analysis of protein and signaling pathway of the five species in the study.

**Supplementary data file 11** Expanded gene families from CAFÉ software (<https://github.com/hahnlab/CAFÉ>).

**Supplementary data file 12** Contracted gene families from CAFÉ software (<https://github.com/hahnlab/CAFÉ>).

**Supplementary data file 13** Zipped file including expanded and contracted gene families phylogenetic trees.

**Supplementary data file 14** Comparative analysis of PBP/GOBP families of the five species in the study.

**Supplementary data file 15** Summary of structural variation, duplication, deletion, inversion, tandem duplication of the five species in the study.

**Supplementary data file 16** Total numbers of structural variations (SVs) of the five species in the study.

**Supplementary data file 17** Parameter estimates and likelihood scores for transient receptor potential ion channels (Melastatin) (TRPM) genes under models of variable  $\omega$  ratios.

**Supplementary data file 18** Zipped files of LastZ alignments of red palm weevil (*R. ferrugineus*) against red flour beetle (*T. castaneum*)
